# Supplementary material for: Mechanism-Based Sonodynamic–Chemo Combinations against Triple-Negative Breast Cancer
Source: MDPI journal article supplement (doi:10.3390/ijms23147981), 2022-07-20
Supplement: s1 [file s1]

## Supporting information

### Mechanism-Based Sonodynamic-Chemo Combinations against Triple-Negative Breast Cancer

Xiaolan Feng<sup>1,2,†</sup>, Chen Wu<sup>1,2,†</sup>, Wenhao Yang<sup>1,2</sup>, Jiayi Wu<sup>1,2</sup>, Pan Wang<sup>1,2,\*</sup>

<sup>1</sup> Key Laboratory of Medicinal Resources and Natural Pharmaceutical Chemistry, Ministry of Education;

<sup>2</sup> National Engineering Laboratory for Resource Developing of Endangered Chinese Crude Drugs in Northwest of China, College of Life Sciences, Shaanxi Normal University, Xi'an 710119, China.

\* Correspondence: wangpan@snnu.edu.cn; Tel.: +86-029-85310275.

† These authors contributed equally to this work.

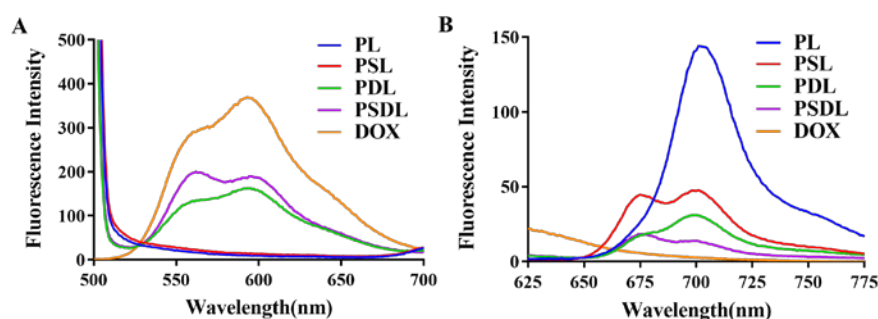

**Figure S1.** The fluorescence emission spectra of DOX (A, 480 nm excitation) and Pp18 (B, 410 nm excitation).

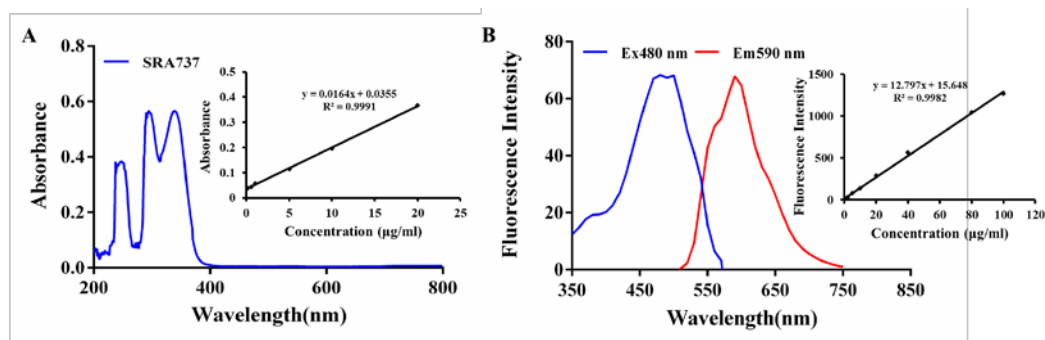

**Figure S2.** The spectrum and standard curve. (A) Absorption spectrum and standard curve of SRA737; (B) Excitation-Emission spectroscopy and standard curve of DOX.

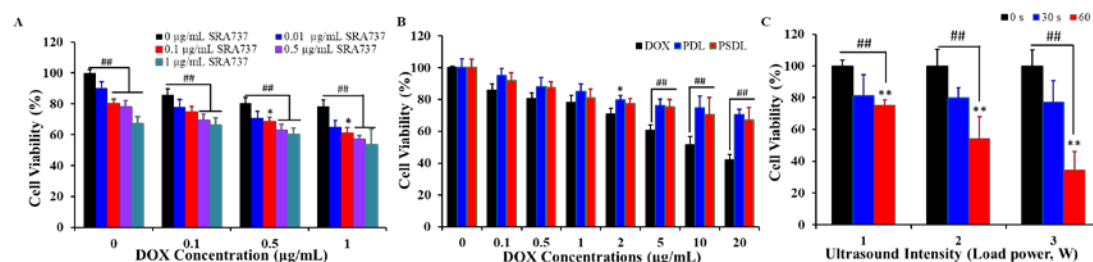

**Figure S3.** Cytotoxicity evaluation in vitro. (A) The effects of different concentrations of DOX combined with SRA737 on MDA-MB-231 cells viability; (B) The effect of different treatments

on the cell viability; (C) Different ultrasonic intensity and duration time on cell survival rate.

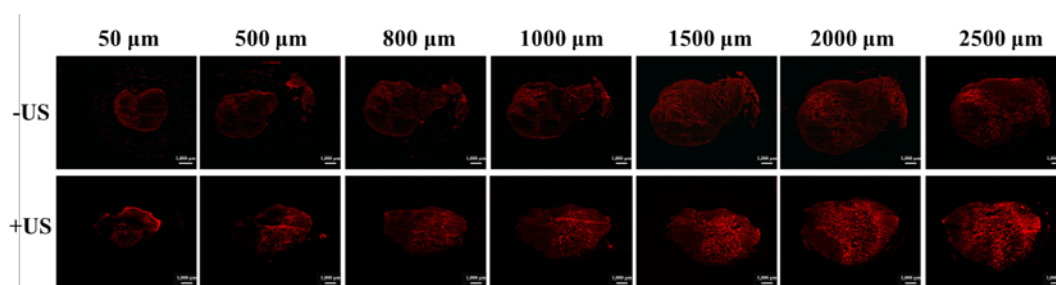

**Figure S4.** Continuous frozen sections were used to detect the penetration of PDL in tumor tissues with or without US using the red fluorescence of emission DOX. Bar = 1000  $\mu$ m.

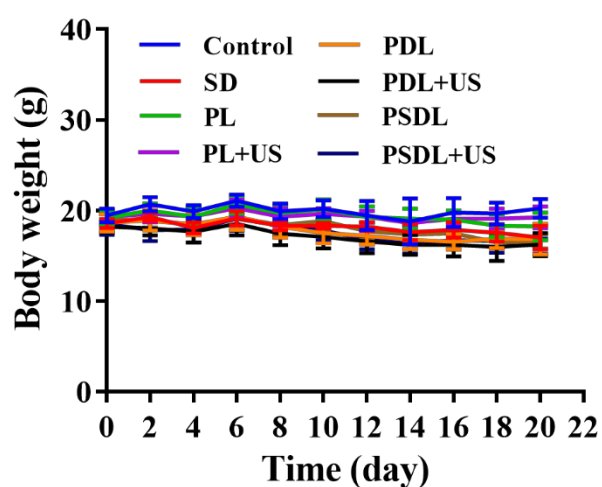

**Figure S5.** The body weight of MDA-MB-231 tumor-bearing nude mice after different treatments.

**Table S1.** Drug Loading Properties of PSL

| SRA737:<br>P-Lipos | Mean diameter<br>(nm) | PDI              | Encapsulation<br>efficiency (%) | Loading<br>efficiency (%) |
|--------------------|-----------------------|------------------|---------------------------------|---------------------------|
| 1: 100             | 106.5 $\pm$ 3.80      | 0.030 $\pm$ 0.03 | 19.33% $\pm$ 3.22               | 0.19% $\pm$ 0.03          |
| 1:50               | 116.6 $\pm$ 5.78      | 0.035 $\pm$ 0.05 | 35.77% $\pm$ 4.12               | 0.70% $\pm$ 0.08          |
| 1:25               | 124.6 $\pm$ 3.44      | 0.030 $\pm$ 0.03 | 26.60% $\pm$ 0.92               | 1.02% $\pm$ 0.04          |
| 1:20               | 128.4 $\pm$ 3.54      | 0.068 $\pm$ 0.03 | 29.31% $\pm$ 2.15               | 1.40% $\pm$ 0.10          |

**Table S2.** Drug Loading Properties of PDL

| DOX: P-<br>Lipos | Mean<br>diameter (nm) | PDI              | Encapsulation<br>efficiency (%) | Loading<br>efficiency (%) |
|------------------|-----------------------|------------------|---------------------------------|---------------------------|
| 1:50             | 119.3 $\pm$ 3.82      | 0.103 $\pm$ 0.07 | 45.33% $\pm$ 4.55               | 0.89% $\pm$ 0.09          |
| 1:25             | 123.9 $\pm$ 1.92      | 0.064 $\pm$ 0.05 | 60.78% $\pm$ 4.11               | 2.34% $\pm$ 0.16          |
| 1:20             | 126.8 $\pm$ 5.27      | 0.042 $\pm$ 0.04 | 67.60% $\pm$ 3.46               | 3.22% $\pm$ 0.16          |
| 1:10             | 132.5 $\pm$ 4.31      | 0.067 $\pm$ 0.06 | 49.90% $\pm$ 2.46               | 4.54% $\pm$ 0.22          |

**Table S3.** The mean diameter, PDI and encapsulation efficiency in different nanoparticles.

| Sample | Mean Diameter (nm) | PDI        | Encapsulation efficiency (%) - SRA737 | Encapsulation efficiency (%) - DOX |
|--------|--------------------|------------|---------------------------------------|------------------------------------|
| PL     | 114.7±3.49         | 0.095±0.06 | --                                    | --                                 |
| PSL    | 125.8±2.60         | 0.049±0.03 | 35.77%±4.12                           | --                                 |
| PDL    | 126.9±3.46         | 0.041±0.04 | --                                    | 68.85%±4.10                        |
| PSDL   | 132.7±3.10         | 0.036±0.04 | 31.34%±3.52                           | 60.52%±5.65                        |
